# Supplementary material
Source: publisher figshare collection journal article supplement (https://rs.figshare.com/ndownloader/files/15377840)
Supplement: Supplementary file 1 [file 15377840]

**Title**: Local habitat, not phylogenetic relatedness, predicts gut microbiota better within folivorous than frugivorous lemur lineages

**Authors:** Lydia K. Greene, Jonathan B. Clayton, Ryan S. Rothman, Brandon P. Semel, Meredith A. Semel, Thomas R. Gillespie, Patricia C. Wright, Christine M. Drea

**S1. Storage condition via hierarchical clustering**

To demonstrate that the principle source of variation in our GMB dataset did not derive from variation in sampling condition, i.e., the use of OMNIgene.GUT buffer, ethanol, and direct freezing, we performed a hierarchical clustering analysis on our unweighted UniFrac distance matrix via the hclust() function in Rstudio. We present the resulting dendrogram, with the shape and color scheme adopted from our main figures. The dendrogram shows that the predominate source of variation in our data is host genus, with the first node splitting the brown lemurs and the sifakas. Within the sifakas, the next nodes separate rainforest from dry-forest inhabitants, and three nodes within each lineage split the six species. Within the brown lemurs, the rainforest and dry-forest inhabitants show considerable overlap. The storage conditions are sprinkled throughout the dendrogram.

S1.1. Dendrogram of unweighted UniFrac distances for all subjects. Brown lemurs and sifakas are denoted by orange and green, respectively. Pale shades reflect dry-forest inhabitants and dark shades reflect rainforest inhabitants. Circles refer to host genera, other shapes refer to individual host species. Information about the storage condition, along with host species and sampling site, is provided in the annotations.

**S2. Rarefaction analyses**

In our main text, we retained all sequences from samples represented by > 10,000 reads and did not rarefy. We used sequence depth (# of reads) as an explanatory variable in our multivariate analyses. By repeating our analyses on a subset of rarefied data, we further confirmed that additional data normalization would not change our results. Specifically, we used the default commands in QIIME to rarefy all samples to a depth of 11,646, the number of sequences represented by our lowest-covered sample. We then used the rarefied .biom table to re-compute metrics of alpha and beta diversity, and repeated our analyses of alpha diversity across all samples via Linear Mixed Models and repeated our analyses of beta diversity across all samples via permutational analyses of variance using distance (‘adonis) in Rstudio. We used the identical set of explanatory and random terms on these rarefied data, except that we no longer used sequence depth as a factor.

Rarefying sequence data and re-computing analyses did not change our results with regard to host traits (see electronic supplementary material, S3). Notably, for alpha diversity, the effect of host genus remained significant, with the GMBs of brown lemurs having greater Shannon and phylogenetic diversity scores (Table S2.1). For beta diversity, overall effects of host genus and habitat also remained (Table S2.2) and plotting unweighted UniFrac distances in Principle Coordinate space showed nearly identical patterns to those depicted in figure 1 in the main text (figure S2.1).

Table S2.1. Results of Linear Mixed Models of alpha diversity stemming from rarefied data.

| **Effect** | **Trend** | **Shannon index** | | **phylogenetic diversity** | |
| --- | --- | --- | --- | --- | --- |
| z | *p* | z | *p* |
| host genus | brown lemurs > sifakas | **3.09** | **0.002** | **4.76** | **< 0.001** |
| habitat type | dry forest = rainforest | -1.46 | 0.145 | 0.48 | 0.63 |
| storage condition | frozen > ethanol | *1.84* | *0.065* | 0.88 | 0.39 |
| omnigene = ethanol | 0.86 | 0.388 | 1.33 | 0.18 |

Note. Significant effects are bolded**;**trends are italicized*.*

Table S2.2. Results of permutational ‘adonis’ analyses of beta diversity from rarefied data.

| **Effect** | **Unweighted UniFrac distance** | | | | **Weighted UniFrac distance** | | | |
| --- | --- | --- | --- | --- | --- | --- | --- | --- |
| R2 | F | Df | *p* | R2 | F | Df | *p* |
| host genus | **0.014** | **2.01** | **1** | **0.031** | **0.025** | **4.01** | **1** | **0.017** |
| habitat type | **0.077** | **10.74** | **1** | **0.001** | **0.170** | **27.16** | **1** | **0.001** |
| storage condition | **0.026** | **1.82** | **2** | **0.010** | **0.038** | **3.11** | **2** | **0.006** |
| host genus/species | *0.067* | *1.17* | *8* | *0.095* | *0.072* | *1.47* | *8* | *0.070* |

Note. Significant effects are bolded**;**trends are italicized*.*


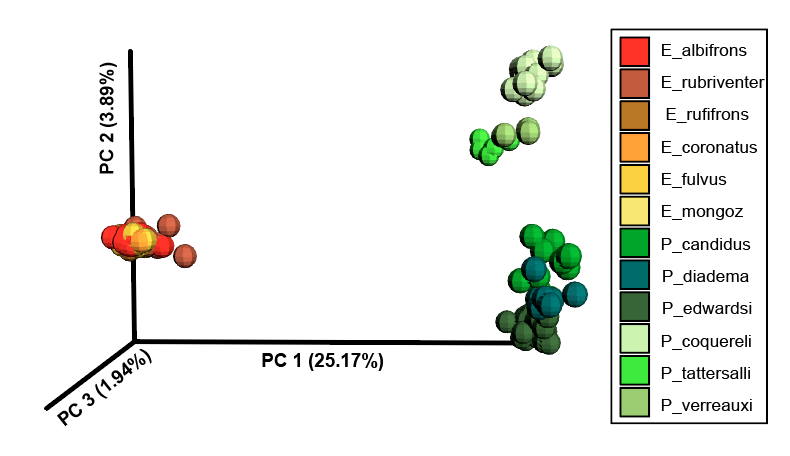
Figure S2.1. QIIME-generated Principle Coordinate Plot of unweighted UniFrac distances calculated from rarefied OTUs. Colour families refer to lemur genera, pale shades refer to dry-forest inhabitants, dark shades refer to rainforest inhabitants, and unique colours refer to distinct host species.

**S3. Results from all statistical models and analyses presented in the main text**

The results of Linear Mixed Models (LMM) of alpha diversity on our full dataset (i.e., non-rarefied dataset) are presented in the table below (Table S3.1). The LMMs were implemented via the glmmADMB package in Rstudio. We entered data from each sample individually, and used host genus, habitat type, storage condition, and sequence depth as explanatory variables, and species as a random term.

Table S3.1. Results from Linear Mixed Models of alpha-diversity metrics

| **Effect** | **Trend** | **Shannon index** | | **phylogenetic diversity** | |
| --- | --- | --- | --- | --- | --- |
| z | *p* | z | *p* |
| host genus | brown lemurs > sifakas | **2.81** | **0.003** | **4.00** | **< 0.001** |
| habitat type | dry forest = rainforest | -1.20 | 0.2314 | 0.44 | 0.66 |
| storage condition | frozen = ethanol | 1.56 | 0.1186 | 0.62 | 0.54 |
| omnigene = ethanol | 0.87 | 0.3817 | 1.48 | 0.14 |
| sequence depth |  | **3.48** | **0.005** | **19.74** | **< 0.001** |

Note: Significant findings are bolded.

The full results from permutational multivariate analyses of distance (‘adonis’) applied to unweighted and weighted UniFrac distances are presented in the table below (Table S3.2). In these analysis, implemented via the vegan package in Rstudio, we included each sample as its own data point, and used host genus, habitat type, storage condition, sequence coverage, and species nested within its genus as explanatory variables.

Table S3.2. Results from permutational ‘adonis’ analysis of beta-diversity metrics

| **Effect** | **Unweighted UniFrac distance** | | | | **Weighted UniFrac distance** | | | |
| --- | --- | --- | --- | --- | --- | --- | --- | --- |
| R2 | F | Df | *p* | R2 | F | Df | *p* |
| host genus | **0.013** | **1.82** | **1** | **0.024** | **0.024** | **3.99** | **1** | **0.018** |
| habitat type | **0.065** | **9.06** | **1** | **0.001** | **0.170** | **26.60** | **1** | **0.001** |
| storage condition | **0.024** | **1.70** | **2** | **0.010** | **0.036** | **3.06** | **2** | **0.008** |
| sequence depth | 0.008 | 1.12 | 1 | 0.213 | 0.007 | 1.25 | 1 | 0.224 |
| host genus:species | **0.072** | **1.26** | **8** | **0.017** | **0.086** | **1.82** | **8** | **0.008** |

Note: Significant findings are bolded.

We repeated ‘adonis’ analyses within the brown lemurs and sifakas separately, to test if habitat was a significant predictor of GMB phylogenetic divergence within each genus. The results are presented below (Table S3.3). In these analyses, habitat type, storage condition, sequence depth, and species nested within habitat type were entered as explanatory variables.

Table S3.3. Results from permutational ‘adonis’ analysis of beta-diversity metrics within genera

| **Host genus** | **Effect** | **Unweighted UniFrac distance** | | | | **Weighted UniFrac distance** | | | |
| --- | --- | --- | --- | --- | --- | --- | --- | --- | --- |
| R2 | F | Df | *p* | R2 | F | Df | *p* |
| brown lemurs | habitat type | 0.018 | 1.02 | 1 | 0.346 | 0.013 | 0.73 | 1 | 0.747 |
|  | storage condition | **0.023** | **1.31** | **1** | **0.002** | **0.031** | **1.83** | **1** | **0.042** |
|  | sequence depth | 0.019 | 1.05 | 1 | 0.189 | 0.02 | 1.18 | 1 | 0.260 |
|  | habitat:species | *0.075* | *1.06* | *4* | *0.051* | **0.094** | **1.37** | **4** | **0.047** |
| sifakas | habitat type | **0.033** | **2.41** | **1** | **0.001** | **0.073** | **5.91** | **1** | **0.001** |
|  | storage condition | **0.040** | **1.42** | **2** | **0.001** | **0.067** | **2.72** | **2** | **0.001** |
|  | sequence depth | 0.013 | 1.01 | 1 | 0.375 | *0.023* | *1.82* | *1* | *0.078* |
|  | habitat:species | 0.030 | 1.09 | 2 | 0.131 | **0.046** | **1.85** | **2** | **0.026** |

Note: Significant findings are bolded**;** trends are italicized.

The full results from Wilcoxon tests of unweighted and weighted UniFrac distances are presented in the table below (Table S3.4). In these tests, implemented in Rstudio, we used one value per species comparison by averaging across each lemur pair. We then computed a Wilcoxon test within and between host genera and habitats.

Table S3.4. Results from Wilcoxon tests of UniFrac distances

| **Category** | **Comparison** | **Unweighted UniFrac** | | | **Weighted UniFrac** | | |
| --- | --- | --- | --- | --- | --- | --- | --- |
| W | z | *p* | W | z | *p* |
| host genus | sifaka-sifaka > brown-brown lemur | **0** | **5.688** | **< 0.001** | **10** | **4.776** | **< 0.001** |
| brown-brown lemur < brown lemur-sifaka | **0** | **-7.194** | **< 0.001** | **0** | **-7.194** | **< 0.001** |
| sifaka-sifaka < brown lemur-sifaka | **0** | **-7.194** | **< 0.001** | **0** | **-7.194** | **< 0.001** |
| brown lemurs | dry-dry forest = rain-rainforest | 0 | -1.6449 | 0.10 | 6 | 0.3853 | 0.7 |
| dry-dry forest = dry-rain forest | 3 | -1.8547 | 0.0636 | 15 | 0.1717 | 0.8636 |
| rain-rain forest = dry-rain forest | 21 | -1.2561 | 0.2091 | 22 | -1.4558 | 0.1455 |
| sifakas | dry-dry forest = rain-rainforest | 7 | -0.8416 | 0.40 | 6 | 0.3853 | 0.7 |
| dry-dry forest = dry-rain forest | 7 | -1.0762 | 0.2818 | 8 | 0.8914 | 0.3727 |
| rain-rain forest > dry-rain forest | **0** | **-2.6086** | **0.0091** | 0 | -1.4558 | 0.1455 |
| habitats | dry-rain forest brown lemurs < sifakas | **0** | **-4.1010** | **< 0.001** | **0** | **-4.1010** | **< 0.001** |

Note: Significant findings are bolded.

The full results from Mantel tests, in which we compared matrices of unweighted and weighted UniFrac distances to host divergence times are presented in the table below (Table S3.5). In these analyses, implemented via the ade4 package in Rstudio, we entered species comparisons as average values, calculated across each lemur pair. We reported results relative to unweighted metrics in the main text.

Table S3.5. Results from mantel tests of phylogenetic and microbial distance averaged across species

| **Comparison** | **Unweighted UniFrac distance** | | **Weighted UniFrac distance** | |
| --- | --- | --- | --- | --- |
| r | *p* | r | *p* |
| **across all hosts** | **0.9619** | **< 0.001** | **0.9321** | **0.002** |
| within brown-lemur lineage | -0.0270 | 0.449 | -0.3093 | 0.803 |
| within sifaka lineage | 0.2230 | 0.286 | 0.2434 | 0.166 |

Note: Significant findings are bolded.

**S4. Results of Weighted UniFrac distances relative to host genus and habitat type**

In the main text, we focused on unweighted UniFrac distances to represent beta diversity. Here, we present comparable results and figures based on weighted UniFrac distances.

Analysis of beta diversity indicated that there was an overall effect of host genus (PERMANOVA of weighted UniFrac: R2 = 0.024, *p* = 0.018; figure S4.1a). In pairwise comparisons of beta diversity, averaged across species, GMB variation between host genera exceeded that between congenerics (Wilcoxon test of weighted UniFrac: W = 0, z = 7.194, *p* < 0.001, for both lineages, figure S4.1b). Moreover, there was significantly more between-species variation in sifakas than in brown lemurs (Wilcoxon test of weighted UniFrac: W = 10, z = 4.776, *p* < 0.001). Reconstructing evolutionary patterns using mean pairwise comparisons revealed a significant relationship between host phylogenetic divergence and gut microbial divergence (Mantel test of weighted UniFrac: r = 0.9321, *p* = 0.002; figure S4.1c); however, this relationship was not present within lineages (Mantel tests of brown lemur weighted UniFrac: r = -0.3093, *p* = 0.803; sifaka weighted UniFrac: r =0.2434, *p* = 0.166, S4.1d).

**Figure S4.1.** Gut microbiome beta diversity relative to host phylogenetic relationships. Shown in (*a-d*) are results based on the beta diversity measure of weighted UniFrac distance, illustrated as (*a*) a Principle Coordinate (PC) plot, (*b*) mean pairwise comparisons, and (*c,d*) microbiome phylogenetic divergence relative to host phylogenetic divergence, both (*c*) across all species comparisons and (*d*) within host lineages. White circles (in *c*) represent comparisons between genera; dashed lines (in *c,d*) represent regression lines. *** denotes significance at *p* < 0.001.

Although host phylogeny did not explain GMB differences within genera, habitat was significantly associated with microbiome distances in sifakas (figure S4.2a-c). Analysis of beta diversity across all subjects revealed an overall effect on GMBs of rainforest vs. dry-forest habitats (PERMANOVA of weighted UniFrac: R2 = 0.17, *p* < 0.001). Within lineages, the relationship between habitat and GMB beta diversity was non-significant for the brown lemurs (PERMANOVA of UUF: R2 = 0.013, *p* = 0.75 figure S4.2a), but was significant for the sifakas (PERMANOVA of UUF: R2 = 0.073, *p* = 0.001; figure S4.2b). Pairwise comparisons of beta diversity, averaged across species, indicated that there was significantly more GMB variation for sifaka congenerics inhabiting different forest types than for brown lemur congenerics inhabiting different forest types (Wilcoxon test of weighted UniFrac: W = 0, z = 4.101, *p* < 0.001; figure S4.2c).

**Figure S4.2** Gut microbiome beta diversity relative to host habitat type. Shown colour-coded by host genus and habitat, with shapes reflecting species identity, are (*a-b*) Principe Coordinate (PC) plots and (*c*) pairwise comparisons of weighted UniFrac distances. *** denotes significance at *p* < 0.001.

**S5. Stacked bar charts highlighting gut microbiome taxonomic composition**

The gut microbiomes of brown lemurs and sifakas were dominated by members of the bacterial orders, Bacteroidales and Clostridiales, from the Bacteroidetes and Firmicutes phyla, respectively, which together accounted for 53.4% of sequences, on average, across subjects. Lesser contributions derived from various taxa within Cyanobacteria, Proteobacteria, Spirochaetes and Verrucomicrobia. The major microbial taxa present in the consortia of the study subjects are graphed in Figure S5.1 below, relative to host genus and habitat type.

**Figure S5.1**. Stacked bar charts (y axis) for allstudy subjects (x axis), showing the most abundant taxa in the gut microbiomes of brown lemurs and sifakas. Included are all the taxonomic orders (top) and genera (bottom) that each accounted for > 1% of sequences, on average, across samples. Microbial phyla are bolded and represented by colour families, with individual orders and genera represented by unique colours. ‘Unassigned’ refers to all microbes that could not be assigned to a kingdom of life; ‘Other’ refers to the sum of all other taxa that each accounted for < 1% of sequences, on average, across samples.

**S6. Results of sympatric vs. allopatric brown lemurs: A test of *E. rubriventer***

In our dataset, we had representation from one brown lemur species, the red-bellied lemur (*E. rubriventer*) at two different locations, Marojejy National Park (NP) and Ranomafana NP. The red-bellied lemur has the most extensive north-south range of any brown lemur, and occupies the majority of rainforests on the island. In the north (Marojejy NP), red-bellied lemurs are sympatric with white-fronted brown lemurs (*E. albifrons*), whereas in the south (Ranomafana NP), they are sympatric with red-fronted lemurs (*E. rufifrons*). This subset of our data therefore allowed us to probe whether the gut microbiome (GMB) of red-bellied lemurs would cluster by species or by habitat, i.e., would Marojejy and Ranomafana NPs each have their own ‘brown lemur’ signature, or would red-bellied lemurs have a GMB composition distinct from their sympatric congenerics?

Using OTU profiles, we retained data for this subset of brown lemurs and recalculated metrics of beta diversity, i.e., unweighted and weighted UniFrac distances. We used beta diversity metrics and Wilcoxon tests to compare pairwise distances between brown lemurs in Marojejy NP and Ranomafana NP, and between red-bellied lemurs across sites. We further visualized differences using Principle Coordinate plots.

Overall, there was significantly more GMB variability between allopatric red-bellied lemur populations than between sympatric species of brown lemurs (figure S6.1). Pairs of allopatric red-bellied lemurs from different populations harbored GMBs that had greater microbial distances compared to pairs of sympatric brown lemurs from different species in Ranomafana NP (Wilcoxon tests of unweighted: W = 3632, *p* < 0.001; weighted: W = 8136, *p* = 0.0103) and Marojejy NP (Wilcoxon test of weighted: W = 10438, *p* = 0.0059).

These results indicate that habitat more strongly modulates the GMB of brown lemurs than does species identity, as the GMBs of two, distinct red-bellied lemur populations clustered more strongly with those of their sympatric congenerics than they did with each other. Nevertheless, these results should be interpreted with caution, as there are two potential confounding factors in our dataset: Firstly, samples from Marojejy NP were collected in OMNIgene.GUT buffer, whereas those from Ranomafana NP were collected in 96% ethanol. Secondly, the samples from Marojejy NP were collected in March and July, whereas those from RNP were collected in March and April. Although we cannot tease apart such effects with our present dataset, we expect the effect of habitat to persist even in future analyses controlling for potential storage preservation and seasonal confounds.

**Figure S6.1.** Beta diversity metrics relative to sympatric and allopatric populations of brown lemurs. (top row) pairwise comparisons of UniFrac distances between red-bellied lemurs in two different sites, and within sympatric brown lemurs from different species; (bottom row) Principle Coordinate (PC) plots of UniFrac distances within and between species (colour families) and field sites (shades).. ** denotes *p* < 0.01; *** denotes *p* < 0.001.
